# Supplementary material for: Further Delineation of Duplications of ARX Locus Detected in Male Patients with Varying Degrees of Intellectual Disability
Source: MDPI journal article supplement (doi:10.3390/ijms23063084), 2022-03-13
Supplement: s1 [file s1]

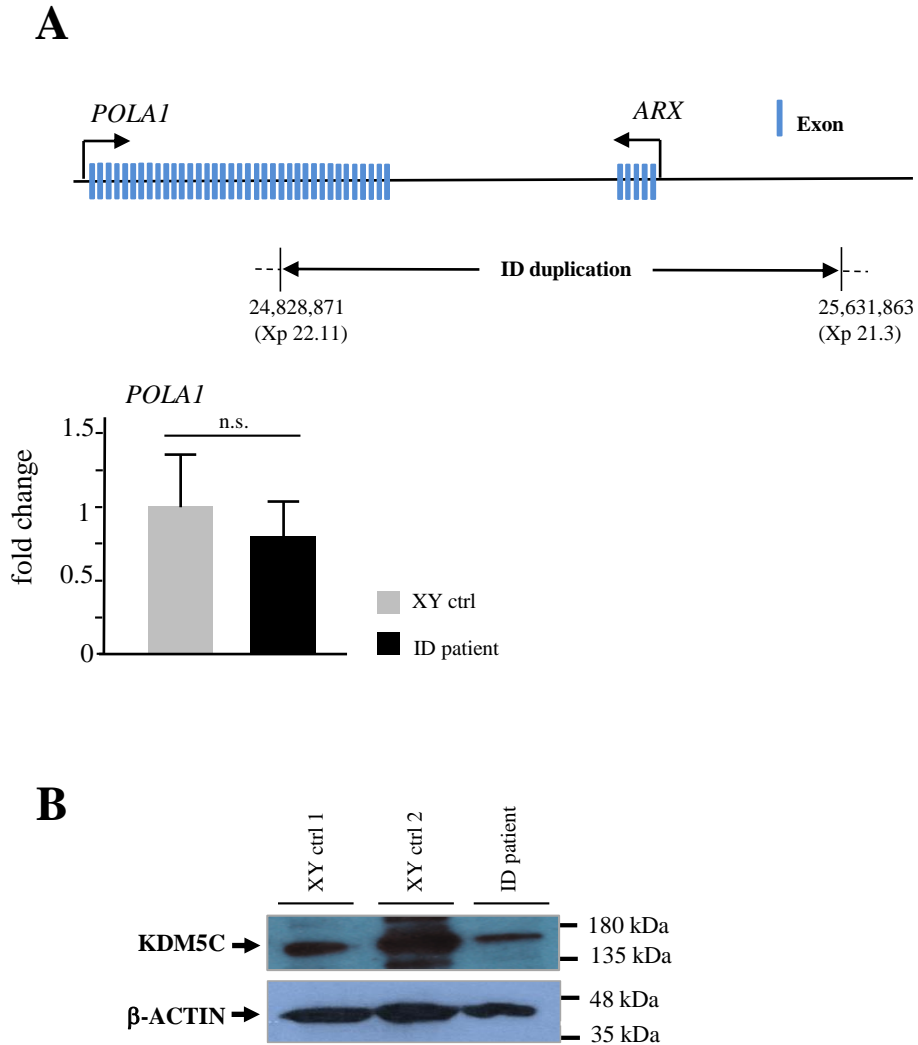

**Figure S1.** *POLA1* expression levels by RT-PCR study in lymphoblastoid cell lines of GE#1 ID patient and XYWT control (A). Results were normalized using *HPRT1* as reference gene and shown as mean  $\pm$  SD from three independent experiments. A cartoon map of *POLA1* and *ARX* loci is shown.

Detection of KDM5C levels by Western blotting analysis in lymphoblastoid cell lines of GE#1 ID patient and XYWT controls. The western blotting experiments were repeated three times. As loading control,  $\beta$ -ACTIN was used. (B).
